# Supplementary material for: Remodeling of dermal adipose tissue alleviates cutaneous toxicity induced by anti-EGFR therapy
Source: eLife. 2022 Mar 24;11:e72443. doi: 10.7554/eLife.72443 (PMC8947768; doi:10.7554/eLife.72443)
Supplement: Supplementary file 2. — WBC: white blood cells. W-SCR: WBC-small cell ratio. W-MCR: WBC-middle cell ratio. W-LCR: WBC-large cell ratio. W-SCC: WBC-small cell count. WBC-MCC: WBC-middle cell count. WBC-LCC: WBC-large cell count. RBC: red blood cells. HGB: Haemohlobin. HCT: Haematocrit. MCV: Mean corpuscular volume. MCH: Mean corpuscular haemoglobin. MCHC: Mean corpuscular haemoglobin concentration. RDW-SD: RBC-distribution width standard deviation. RDW-CV: RBC-distribution width variation coefficient. PLT: Platelets. PDW: Platelets distribution width. MPV: Mean platelet volume. P-LCR: Platelet large cell ratio. Data are presented as the means ± SEM. P < 0.05 using 2-tailed unpaired Student’s t test. [file elife-72443-supp2.xlsx]

## Sheet: Table 1
	Ctrl-Afa	HFD-Afa		Ctrl-Afa	HFD-Afa
WBC			RBC
WBC (*10^9/L)	35.00±7.87	20.22±5.23*	RBC (*10^12/L)	9.97±0.08	10.35±1.69
W-SCR	0.54±0.05	0.57±0.08	HGB (g/L)	179.00±5.72	192.40±34.80
W-MCR	0.14±0.03	0.17±0.02	HCT	0.54±0.02	0.56±0.10
W-LCR	0.32±0.02	0.26±0.08	MCV (fL)	53.67±1.28	54.52±1.06
W-SCC (*10^9/L)	18.47±2.76	11.40±2.75*	MCH (pg)	17.97±0.45	18.54±0.75
W-MCC (*10^9/L)	5.10±1.98	3.40±0.89	MCHC (g/L)	334.67±4.03	279.80±124.05
W-LCC (*10^9/L)	11.43±3.46	5.42±2.57*	RDW-SD (fL)	28.80±1.50	27.48±1.61
PLT			RDW-CV	0.14±0.01	0.12±0.01
PLT (*10^9/L)	1373.00±515.77	883.40±570.36
PDW	10.75±0.65	11.00±0.79
MPV (fL)	9.70±0.10	9.40±0.59
P-LCR	0.23±0.01	0.24±0.04
