# Supplementary material for: Remodeling of dermal adipose tissue alleviates cutaneous toxicity induced by anti-EGFR therapy
Source: eLife. 2022 Mar 24;11:e72443. doi: 10.7554/eLife.72443 (PMC8947768; doi:10.7554/eLife.72443)
Supplement: Supplementary file 3. — WBC: white blood cells. W-SCR: WBC-small cell ratio. W-MCR: WBC-middle cell ratio. W-LCR: WBC-large cell ratio. W-SCC: WBC-small cell count. WBC-MCC: WBC-middle cell count. WBC-LCC: WBC-large cell count. RBC: red blood cells. HGB: Haemohlobin. HCT: Haematocrit. MCV: Mean corpuscular volume. MCH: Mean corpuscular haemoglobin. MCHC: Mean corpuscular haemoglobin concentration. RDW-SD: RBC-distribution width standard deviation. RDW-CV: RBC-distribution width variation coefficient. PLT: Platelets. PDW: Platelets distribution width. MPV: Mean platelet volume. P-LCR: Platelet large cell ratio. Data are presented as the means ± SEM. P < 0.05 using 2-tailed unpaired Student’s t test. [file elife-72443-supp3.xlsx]

## Sheet: Table 1
	Vehicle	DCA		Vehicle	DCA
WBC			RBC
WBC (*10^9/L)	21.92±2.76	28.86±1.89**	RBC (*10^12/L)	10.20±1.38	7.93±1.01*
W-SCR	0.48±0.08	0.50±0.06	HGB (g/L)	198.60±25.45	154.40±18.07*
W-MCR	0.07±0.03	0.08±0.02	HCT	0.59±0.08	0.47±0.05*
W-LCR	0.45±0.07	0.43±0.05	MCV (fL)	57.84±1.14	58.40±1.77
W-SCC (*10^9/L)	10.52±2.20	14.26±1.51*	MCH (pg)	19.50±0.59	19.50±0.66
W-MCC (*10^9/L)	1.46±0.63	2.24±0.65	MCHC (g/L)	337.20±4.31	334.00±3.03
W-LCC (*10^9/L)	9.94±2.11	12.36±1.90	RDW-SD (fL)	25.86±0.72	26.46±0.64
PLT			RDW-CV	0.11±0.01	0.11±0.01
PLT (*10^9/L)	1106.40±576.39	1380.60±464.14
PDW	9.34±0.67	8.44±0.14*
MPV (fL)	8.56±0.43	8.12±0.16
P-LCR	0.14±0.03	0.09±0.01*
